# Supplementary material for: Investigation of the Impact Resistance Behavior of Customized Hair Clipper Comb Fabricated by Fused Deposition Modeling
Source: MDPI journal article supplement (doi:10.3390/su14138071), 2022-07-01
Supplement: s1 [file s1]

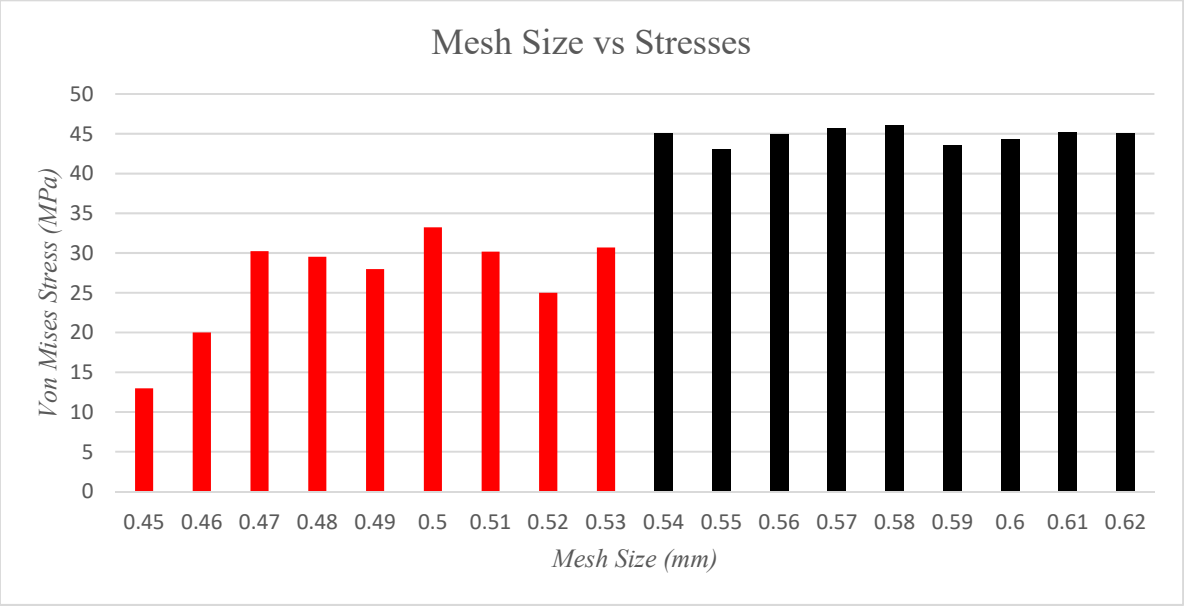

Figure S1. Mesh convergence analysis.

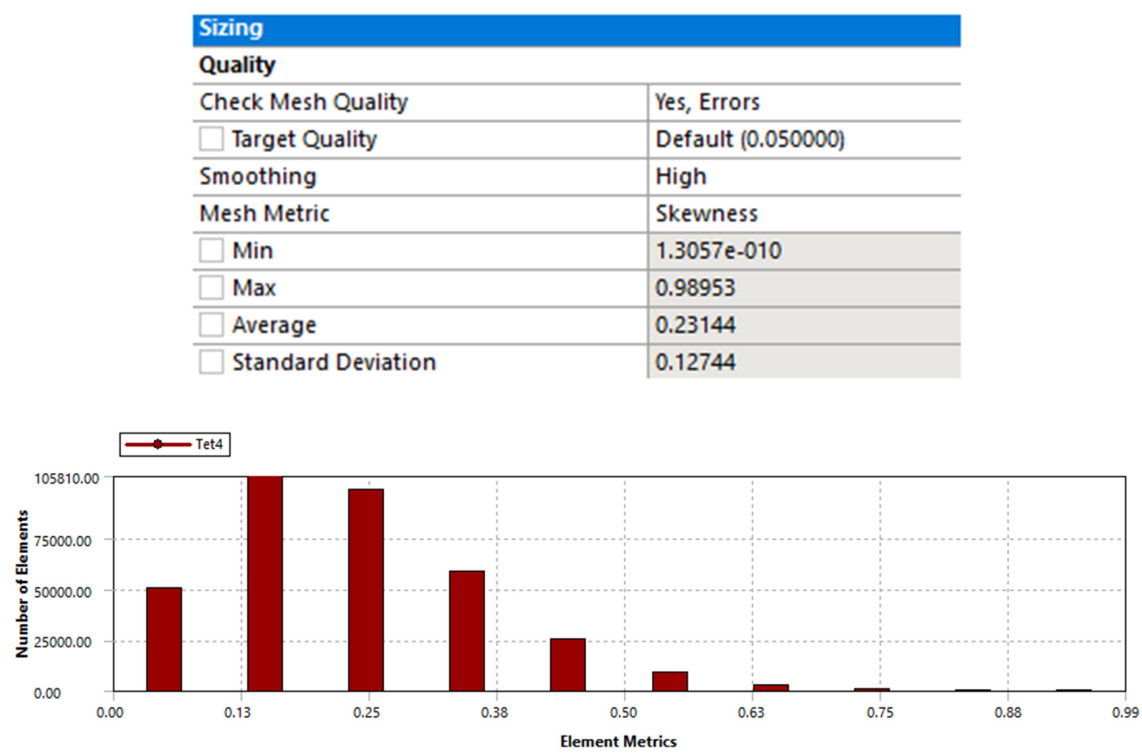

Figure S2. Calculated average skewness value.

| Sizing                                      |                    |
|---------------------------------------------|--------------------|
| Quality                                     |                    |
| Check Mesh Quality                          | Yes, Errors        |
| <input type="checkbox"/> Target Quality     | Default (0.050000) |
| Smoothing                                   | High               |
| Mesh Metric                                 | Orthogonal Quality |
| <input type="checkbox"/> Min                | 1.0466e-002        |
| <input type="checkbox"/> Max                | 1.                 |
| <input type="checkbox"/> Average            | 0.76719            |
| <input type="checkbox"/> Standard Deviation | 0.12575            |

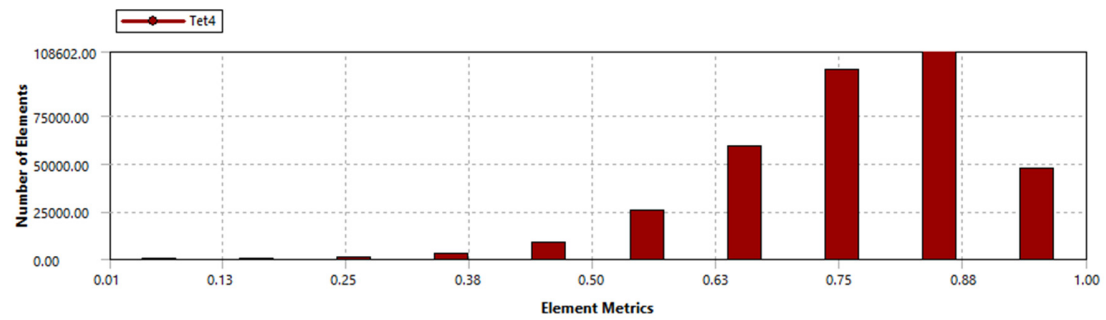

**Figure S3.** Calculated average orthogonal quality value.

**Table S1.** Skewness mesh metrics spectrum.

| Excellent | Very good | Good      | Acceptable | Bad       | Unacceptable |
|-----------|-----------|-----------|------------|-----------|--------------|
| 0-0.25    | 0.25-0.50 | 0.50-0.80 | 0.80-0.94  | 0.95-0.97 | 0.98-1.00    |

**Table S2.** Orthogonal quality mesh metrics spectrum.

| Unacceptable | Bad        | Acceptable | Good      | Very good | Excellent |
|--------------|------------|------------|-----------|-----------|-----------|
| 0-0.001      | 0.001-0.14 | 0.15-0.20  | 0.20-0.69 | 0.70-0.95 | 0.95-1.00 |
